# Supplementary material
Source: PubMed Central journal article supplement (PMC3048798)
Supplement: cc1002_0268SD1.pdf [file cc1002_0268SD1.pdf]

**SUPPLEMENTARY FIGURE**

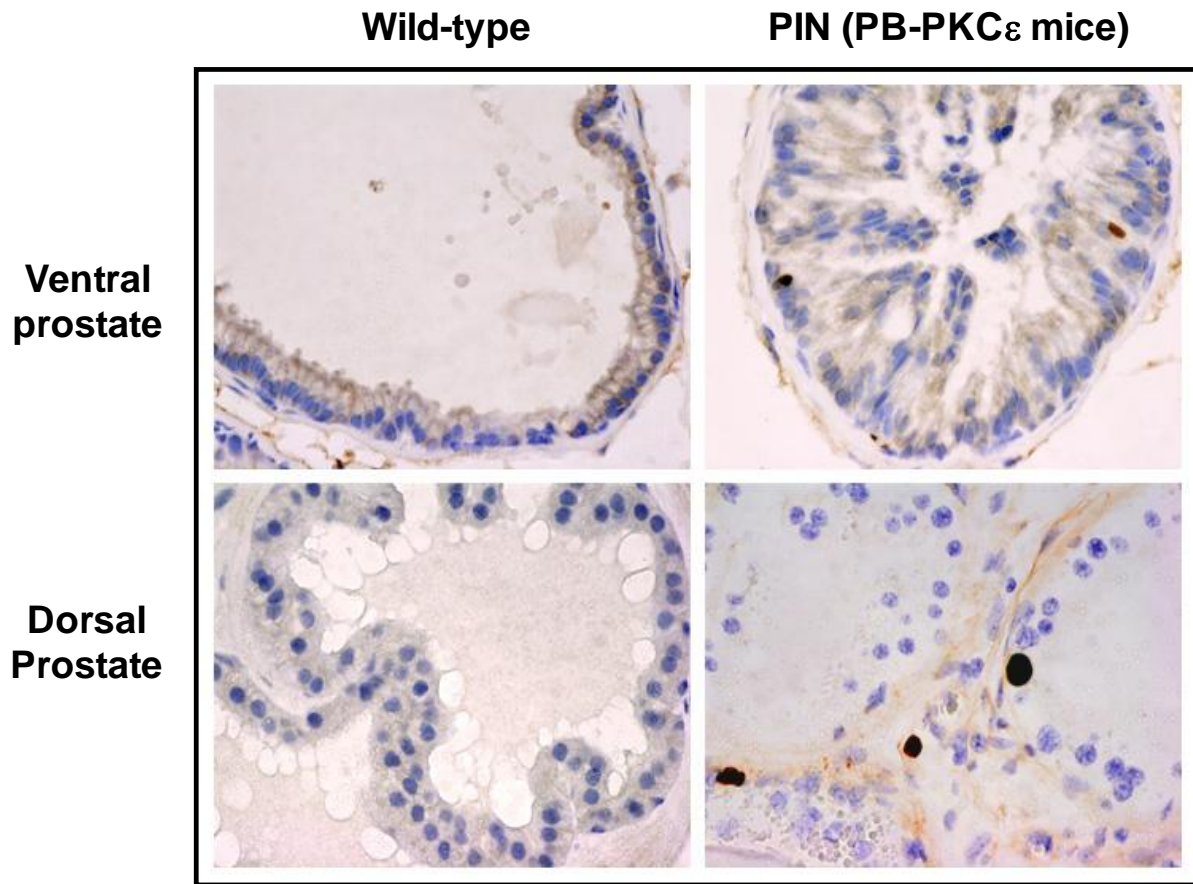

Figure S1: Representative pictures of BrdU incorporation in VP from wild-type and PB-PKC $\epsilon$  mice. All microphotographs are 20X magnification.
